# Supplementary material for: Comparative effectiveness of sotrovimab versus no treatment in non-hospitalised high-risk COVID-19 patients in north west London: a retrospective cohort study
Source: PubMed Central journal article supplement — BMJ Open Respir Res. 2024 Apr 4;11(1):e002238. doi: 10.1136/bmjresp-2023-002238 (PMC11002339; doi:10.1136/bmjresp-2023-002238), 2024-04-04
Supplement: bmjresp-2023-002238supp001.pdf [file bmjresp-2023-002238supp001.pdf]

## Supplementary Data

**Supplementary Table 1. Variables and Models Used for IPTW weighting**

| Analysis                       | PSM Used       | Variables Included in Model                                                                                                                             |
|--------------------------------|----------------|---------------------------------------------------------------------------------------------------------------------------------------------------------|
| Overall cohort                 | GBM            | Age, gender, time period, renal disease, multiple high-risk conditions, moderate-risk conditions, vaccination status, days since vaccination, ethnicity |
| Patients aged <65 years        | Log regression | Age, gender, time period, renal disease, multiple high-risk conditions, moderate-risk conditions, vaccination status, days since vaccination, ethnicity |
| Patients aged ≥65 years        | Log regression | Age, gender, time period, renal disease, multiple high-risk conditions, moderate-risk conditions, vaccination status, days since vaccination, ethnicity |
| Patients without renal disease | Log regression | Age, gender, time period, multiple high-risk conditions, moderate-risk conditions, vaccination status, days since vaccination, ethnicity                |
| Patients with renal disease    | Log regression | Age, gender, time period, multiple high-risk conditions, moderate-risk conditions, vaccination status, days since vaccination, ethnicity                |
| Shielded population            | GBM            | Age, gender, time period, multiple high-risk conditions, moderate-risk conditions, vaccination status, days since vaccination, ethnicity                |

---

|          |                |                                                                                                                                            |
|----------|----------------|--------------------------------------------------------------------------------------------------------------------------------------------|
| Period 1 | Log regression | Age, gender, renal disease, multiple high-risk conditions, moderate-risk conditions, vaccination status, days since vaccination, ethnicity |
| Period 2 | Log regression | Age, gender, renal disease, multiple high-risk conditions, moderate-risk conditions, vaccination status, days since vaccination, ethnicity |
| Period 3 | Log regression | Age, gender, renal disease, multiple high-risk conditions, moderate-risk conditions, vaccination status, days since vaccination, ethnicity |

---

Abbreviations: GBM, gradient boosting machine; IPTW, inverse probability of treatment weighting; PSM, propensity score matching.

1 **Supplementary Table 2. IPTW Metrics (standardised differences)**

| Variable            | Overall Cohort | Patients Aged <65 Years | Patients Aged ≥65 Years | Patients without Renal Disease | Patients with Renal Disease | Shielded Population | Period 1 | Period 2 | Period 3 |
|---------------------|----------------|-------------------------|-------------------------|--------------------------------|-----------------------------|---------------------|----------|----------|----------|
| <b>Age</b>          | 0.08           | 0.08                    | 0.03                    | 0.03                           | -0.00                       | -0.01               | 0.11     | 0.07     | -0.01    |
| <b>Gender</b>       |                |                         |                         |                                |                             |                     |          |          |          |
| Female              | 0.06           | 0.05                    | -0.02                   | 0.05                           | 0.04                        | -0.01               | 0.05     | 0.09     | -0.06    |
| Male                | -0.06          | -0.05                   | 0.02                    | -0.05                          | -0.04                       | 0.01                | -0.05    | -0.09    | 0.06     |
| <b>Ethnicity</b>    |                |                         |                         |                                |                             |                     |          |          |          |
| Asian/Asian British | 0.01           | 0.07                    | 0.03                    | 0.07                           | 0.04                        | -0.05               | 0.04     | -0.02    | 0.03     |
| Black/Black British | -0.08          | -0.03                   | 0.03                    | -0.07                          | 0.03                        | -0.07               | -0.16    | -0.02    | 0.05     |
| Mixed British       | -0.06          | 0.03                    | -0.01                   | 0.09                           | -0.00                       | -0.05               | 0.02     | -0.01    | 0.04     |
| White               | 0.09           | -0.02                   | -0.08                   | -0.00                          | -0.08                       | 0.11                | 0.12     | -0.02    | -0.06    |
| Other               | -0.03          | -0.05                   | 0.06                    | -0.08                          | 0.03                        | 0.01                | -0.10    | 0.08     | -0.01    |
| Null                | 0.00           | -0.01                   | 0.05                    | 0.00                           | -0.00                       | -0.03               | 0.03     | 0.03     | -0.01    |

**Time period of COVID-19 diagnosis**

|          |       |       |       |       |       |       |     |     |     |
|----------|-------|-------|-------|-------|-------|-------|-----|-----|-----|
| Period 1 | -0.12 | -0.07 | -0.07 | -0.01 | 0.05  | -0.12 | ... | ... | ... |
| Period 2 | 0.10  | 0.02  | 0.04  | -0.01 | -0.02 | 0.11  | ... | ... | ... |
| Period 3 | 0.03  | 0.08  | 0.03  | 0.03  | -0.04 | 0.03  | ... | ... | ... |

**Renal disease**

|     |       |       |       |     |     |       |       |       |       |
|-----|-------|-------|-------|-----|-----|-------|-------|-------|-------|
| Yes | 0.07  | 0.07  | 0.07  | ... | ... | 0.05  | 0.03  | -0.02 | -0.04 |
| No  | -0.07 | -0.07 | -0.07 | ... | ... | -0.05 | -0.03 | 0.02  | 0.04  |

**Multiple high-risk conditions**

|     |       |       |       |       |       |       |       |       |       |
|-----|-------|-------|-------|-------|-------|-------|-------|-------|-------|
| Yes | -0.06 | -0.11 | 0.01  | -0.11 | -0.00 | 0.05  | -0.16 | -0.08 | -0.03 |
| No  | 0.06  | 0.11  | -0.01 | 0.11  | 0.00  | -0.05 | 0.16  | 0.08  | 0.03  |

**Moderate-risk conditions**

|     |       |       |       |       |       |       |       |       |       |
|-----|-------|-------|-------|-------|-------|-------|-------|-------|-------|
| Yes | 0.06  | 0.02  | 0.01  | 0.01  | 0.03  | -0.02 | -0.06 | 0.02  | -0.04 |
| No  | -0.06 | -0.02 | -0.01 | -0.01 | -0.03 | 0.02  | 0.06  | -0.02 | 0.04  |

**Solid-organ transplant recipient**

|     |       |       |       |       |       |       |       |       |       |
|-----|-------|-------|-------|-------|-------|-------|-------|-------|-------|
| Yes | 0.01  | -0.02 | 0.00  | -0.01 | -0.00 | 0.05  | -0.04 | -0.01 | -0.00 |
| No  | -0.01 | 0.02  | -0.00 | 0.01  | 0.00  | -0.05 | 0.04  | 0.01  | 0.00  |

**Vaccination status**

|     |       |       |       |       |       |       |       |       |       |
|-----|-------|-------|-------|-------|-------|-------|-------|-------|-------|
| Yes | 0.03  | -0.09 | -0.06 | -0.10 | -0.07 | 0.00  | -0.04 | -0.03 | -0.07 |
| No  | -0.03 | 0.09  | 0.06  | 0.10  | 0.07  | -0.00 | 0.04  | 0.03  | 0.07  |

|             |       |      |      |      |      |       |       |      |      |
|-------------|-------|------|------|------|------|-------|-------|------|------|
| Days since  | -0.06 | 0.09 | 0.03 | 0.07 | 0.08 | -0.09 | -0.02 | 0.02 | 0.10 |
| last        |       |      |      |      |      |       |       |      |      |
| vaccination |       |      |      |      |      |       |       |      |      |

---

2 Abbreviations: IPTW, inverse probability of treatment weighting.

3

## 4 Supplementary Table 3. Power Calculations for IPTW Cox Models

| Characteristic | Subgroup  | Outcome                        | n    | Events | Power of the model | Power calculated when covariates are included           | Power calculated when only treatment without covariates is considered |                    |
|----------------|-----------|--------------------------------|------|--------|--------------------|---------------------------------------------------------|-----------------------------------------------------------------------|--------------------|
|                |           |                                |      |        |                    | Sample size to detect the effect, power=0.8, alpha=0.05 | N in experimental group                                               | N in control group |
| All            | All       | COVID hospitalisation or death | 5790 | 117    | 0.612428795        | 9012                                                    |                                                                       |                    |
|                |           | COVID hospitalisation          | 5790 | 97     | 0.708479937        | 7220                                                    |                                                                       |                    |
|                |           | Death                          | 5790 | 24     | 0.074230386        | 171,363                                                 |                                                                       |                    |
| Age            | <65 years | COVID hospitalisation or death | 4277 | 56     | 0.072947205        | 131,229                                                 |                                                                       |                    |
|                |           | COVID hospitalisation          | 4277 | 53     | 0.115057787        | 58,135                                                  |                                                                       |                    |
|                |           | Death                          | 4277 | <5     | 0.058320818        | 219,652                                                 |                                                                       |                    |
|                | ≥65 years | COVID hospitalisation or death | 1513 | 61     | 0.618501287        |                                                         | 324                                                                   | 1999               |
|                |           | COVID hospitalisation          | 1513 | 44     | 0.641503645        |                                                         | 308                                                                   | 1895               |
|                |           | Death                          | 1513 | 20     | 0.1158032945       |                                                         | 2840                                                                  | 17,521             |
| Time period    | Period 1  | COVID hospitalisation or death | 2946 | 65     | 0.747771624        | 3350                                                    |                                                                       |                    |
|                | Period 2  | COVID hospitalisation or death | 1978 | 31     | 0.163229749        |                                                         | 2336                                                                  | 13,874             |

|                |          |                                |       |     |              |           |        |        |
|----------------|----------|--------------------------------|-------|-----|--------------|-----------|--------|--------|
|                |          | COVID hospitalisation          | 1978  | 22  | 0.137672189  |           | 2962   | 17,592 |
|                |          | Death                          | 1978  | 9   | 0.065472602  |           | 11,068 | 65,744 |
|                | Period 3 | COVID hospitalisation or death | 866   | 21  | 0.062033866  | 38,161    |        |        |
|                |          | COVID hospitalisation          | 866   | 17  | 0.120772999  | 10,924    |        |        |
|                |          | Death                          | 866   | 6   | 0.027298667  | 4,732,766 |        |        |
| Renal disease  | No       | COVID hospitalisation or death | 4442  | 66  | 0.248825474  | 21,221    |        |        |
|                |          | COVID hospitalisation          | 4442  | 57  | 0.228764482  | 23,539    |        |        |
|                |          | Death                          | 4442  | 10  | 0.074942     | 128,927   |        |        |
|                | Yes      | COVID hospitalisation or death | 1348  | 51  | 0.635931523  |           | 375    | 1613   |
|                |          | COVID hospitalisation          | 1348  | 40  | 0.65156293   |           | 362    | 1556   |
|                |          | Death                          | 1348  | 14  | 0.1233399174 |           | 3102   | 13,357 |
| Shielding flag | Yes      | COVID hospitalisation or death | 21320 | 261 | 0.06         | 1,285,303 |        |        |
|                |          | COVID hospitalisation          | 21320 | 194 | 0.15         | 196,438   |        |        |
|                |          | Death                          | 21320 | 84  | 0.8          | 21,475    |        |        |

6 **Supplementary Figure 1. Omicron Subvariant Prevalence in England [1]**

7

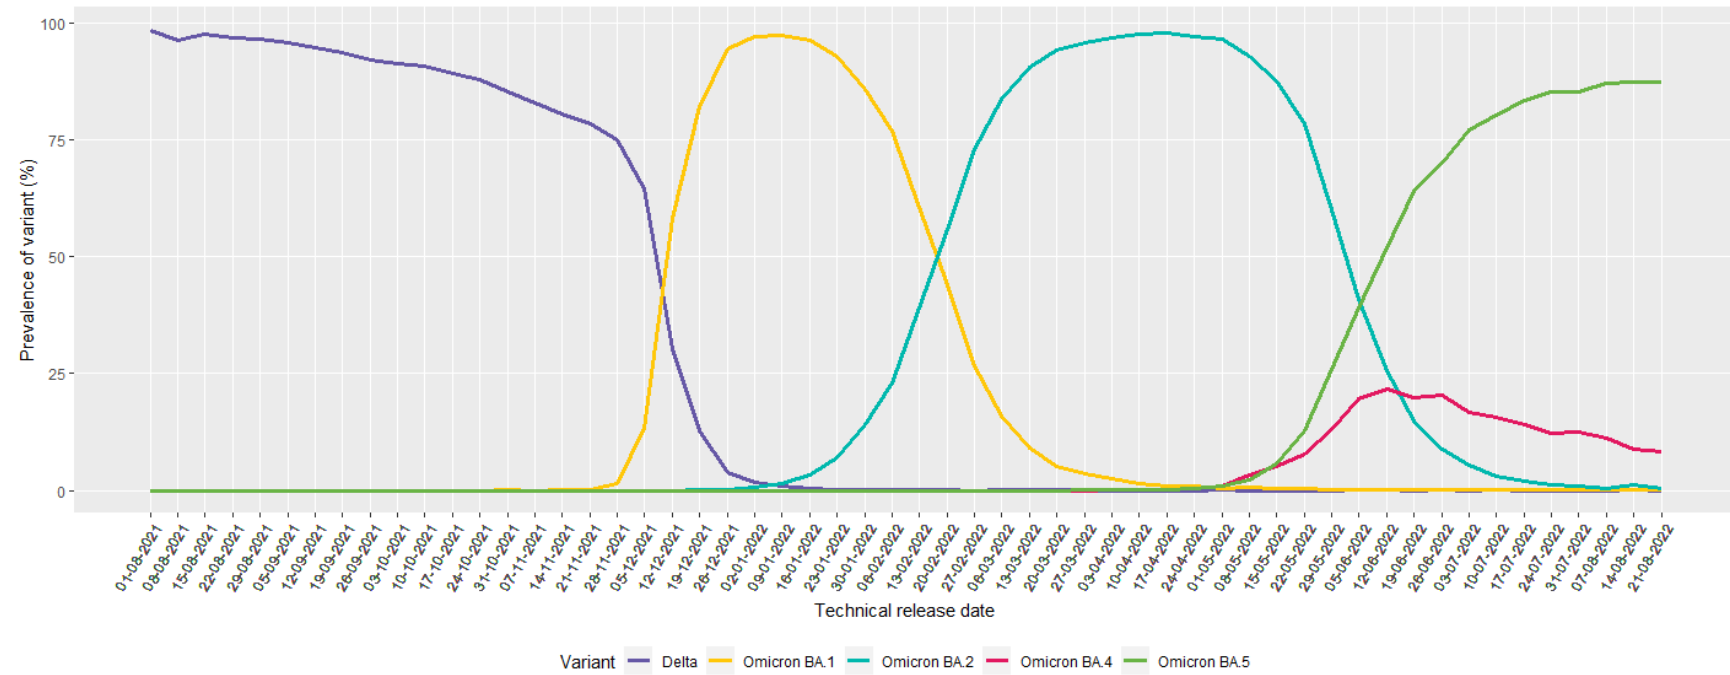

8



9 **Supplementary Figure 2. Observed Time to Treatment, and Imputed Time to**  
10 **Treatment in Untreated Cohort**

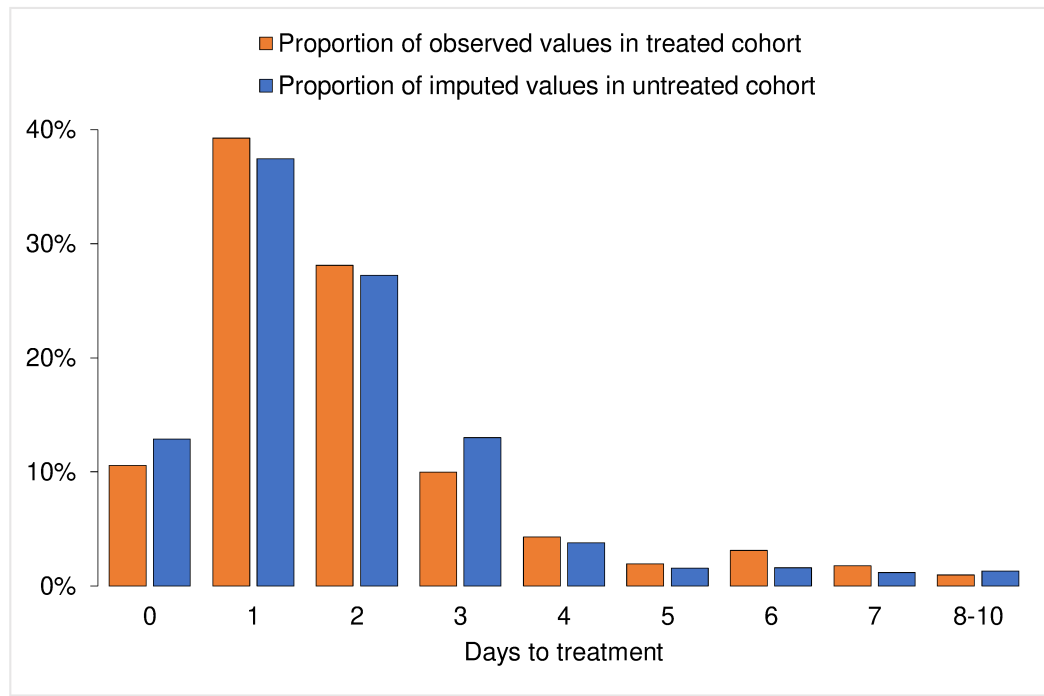

## 11 Exploratory analysis

12 In our previous descriptive analysis, we observed that a high proportion of those prescribed  
13 sotrovimab (39.2%) did not have a code [2]. Therefore, we performed an exploratory  
14 analysis whereby a SNOMED code (1300561000000107; high-risk category for developing  
15 complication from coronavirus disease 19 caused by severe acute respiratory syndrome  
16 coronavirus 2 infection) was used to identify patients who were identified as appropriate for  
17 “shielding” during the early phase of the pandemic. Only patients with the “shielding”  
18 SNOMED code were included in the exploratory analysis, which included patients with and  
19 without NHS highest-risk criteria. The same methods as described for the primary analysis  
20 were utilized for the exploratory analysis.

21 A total of 21 320 patients were identified as appropriate for “shielding”. Of these, 17  
22 921 (84.1%) had a shielding code but no specific highest risk-related diagnosis and 3399  
23 (15.9%) had both. Of patients identified as appropriate for “shielding”, 692 (3.2%) received  
24 sotrovimab and 20 628 (96.8%) were untreated. COVID-19-related hospitalizations were  
25 experienced by 1.4% (n=10/692) of sotrovimab-treated patients and 0.9% (n=184/20 628) of  
26 untreated patients. Death within 1 month of index was reported for fewer than 5 sotrovimab-  
27 treated patients and 0.4% of untreated patients (n=82/20 628). The IPTW HR for composite  
28 COVID-19 hospitalization or death was 1.14 (95% CI=0.48–2.66;  $P=.77$ ) for sotrovimab  
29 versus no treatment; for COVID-19 hospitalization alone the IPTW HR was 1.46 (95%  
30 CI=0.59–3.57;  $P=.41$ ). Sotrovimab treatment was associated with an 82% lower risk of death  
31 alone compared with the untreated group (HR=0.18; 95% CI=0.04–0.73;  $P=.02$ ).

32

33

## 34 **Supplementary References**

- 35 1. UK Health Security Agency. SARS-CoV-2 variants of concern and variants under  
36 investigation in England: technical briefing 43. Available at:  
37 [https://assets.publishing.service.gov.uk/government/uploads/system/uploads/attachm  
ent\\_data/file/1103533/Technical-Briefing-43-24June2022.pdf](https://assets.publishing.service.gov.uk/government/uploads/system/uploads/attachm<br/>38 ent_data/file/1103533/Technical-Briefing-43-24June2022.pdf). Accessed 5 July 2023.
- 39 2. Patel V, Yarwood MJ, Levick B, et al. Characteristics and outcomes of patients with  
40 COVID-19 at high-risk of disease progression receiving sotrovimab, oral antivirals or  
41 no treatment in England. medRxiv [Preprint]. November 29, 2022 [cited 2023 Jul 5].  
42 Available from: <https://doi.org/10.1101/2022.11.28.22282808>.
